# Supplementary material
Source: Elsevier journal article supplement (https://www.sciencedirect.com/science/article/pii/S0001731015001702)
Supplement: mmc1 [file S0001731015001702:mmc1.docx]

| Paciente | Género | Edad | Antecedentes Personales | Tamaño (mm)/Localización | Tiempo de evolución  (meses) | Dolor inicio  (ENV) | Tratamientos previos | Diagnóstico |
| --- | --- | --- | --- | --- | --- | --- | --- | --- |
| 1 | M | 74 | Ca ovario, HTA | 3 /Hélix D | NA | 10/10 | NO | Clínico |
| 2 | M | 79 | HTA, dislipemia, fibrilación auricular, insuficiencia cardíaca | 2 /Hélix D | 12 | 10/10 | Corticoides tópicos | Biopsia |
| 3 | M | 63 | HTA, dislipemia, cardiopatía isquémica, cefalea tensional, cáncer de mama y de pulmón | 10x4/Antehélix I | 6 | 4/10 | NO | Clínico |
| 4 | M | 69 | Melanoma, cáncer de mama, | 3/Antehélix D | 7 | 5/10 | NO | Clínico |
| 5 | M | 83 | HTA, dislipemia, diabetes mellitus y colitisulcerosa | 7/Hélix D | 2 | 9/10 | NO | Clínico |
| 6 | M | 85 | HTA, dislipemia | 10x3/Antehélix D | NA | 6/10 | NO | Clínico |
| 7 | M | 55 | Ninguno | 10/Antehélix I | 24 | 10/10 | Corticoides intralesionales | Biopsia |
| 8 | V | 56 | Cáncer de laringe, tabaquismo | 4/Hélix I | 36 | 10/10 | Corticoides intralesionales | Biopsia |
| 9 | V | 29 | Ninguno | 3/Hélix I | 120 | 10/10 | Corticoides intralesionales | Biopsia |
| 10 | M | 53 | Cáncer de mama | 3/Antehélix D | 142 | 10/10 | Corticoides tópicos | Biopsia |
| 11 | M | 74 | HTA, diabetes mellitus, valvulopatía cardíaca, fibrilación auricular | 5/Hélix I | NA | 8/10 | Corticoides tópicos, cirugía (2 intervenciones) | Biopsia |
| 12 | V | 48 | Psoriasis | 4/Hélix I | 36 | 6/10 | NO | Clínico |
| 13 | M | 81 | HTA, gammapatía monoclonal, depresión | 7/Antehélix D | NA | 7/10 | Corticoides tópicos, crioterapia | Clínico |
| 14 | M | 81 | HTA | 7/Antehélix D | 72 | 7/10 | Corticoides tópicos, crioterapia, cirugía | Biopsia |
| 15 | V | 41 | Talasemia | 5/Hélix D | NA | 8/10 | Crioterapia, cirugía | Biopsia |
| 16 | V | 58 | HTA, dislipemia, diabetes mellitus | 4/Hélix I | 12 | 10/10 | Corticoides intralesionales | Clínico |
| 17 | M | 86 | HTA, bocio multinodular tóxico | 5/Antehélix D | 3 | 10/10 | NO | Clínico |
| 18 | M | 83 | Osteoporosis | 3/Hélix D | NA | 10/10 | NO | Clínico |
| 19 | M | 72 | HTA, dislipemia, diabetes mellitus | 4/Hélix D | NA | 8/10 | NO | Clínico |
| 20 | M | 62 | Ninguno | 7/Antehélix D | 48 | 10/10 | Corticoides tópicos, crioterapia, extirpación | Biopsia |
| 21 | V | 73 | HTA | 6/Hélix I | 72 | 6/10 | Cirugía (2 intervenciones) | Clínico |
| 22 | V | 73 | HTA, dislipemia, diabetes mellitus | 5/Antehélix I | NA | 7/10 | NO | Clínico |
| 23 | V | 75 | Carcinoma epidermoide cutáneo | 3/Hélix I | 3 | 7/10 | NO | Clínico |
| 24 | M | 71 | HTA, dislipemia, obesidad | 3/Antehélix I | 12 | 10/10 | NO | Clínico |
| 25 | M | 72 | Artrosis | 5/Hélix I | NA | 10/10 | NO | Clínico |
| 26 | V | 56 | Diabetes mellitus, carcinoma de laringe | 3/Hélix I | 12 | 4/10 | NO | Clínico |
| 27 | M | 80 | HTA, dislipemia | 10x8/Antehélix I | 240 | 5/10 | Cirugía (2 intervenciones) | Clínico |
| 28 | M | 71 | Ninguno | 6/Hélix I | 36 | 10/10 | Crioterapia | Clínico |
| 29 | M | 62 | Miocardiopatía dilatada, dislipemia, hipotiroidismo | 3/Hélix D | 4 | 8/10 | NO | Clínico |

| Paciente | Respuesta (Nula/Completa/Parcial) | Dolor al inicio de tratamiento  (ENV) | Dolor al fin de tratamiento (ENV) | Duración del tratamiento  (días) | Tolerancia | Seguimiento  Duración  (meses) | Seguimiento (comentarios) |
| --- | --- | --- | --- | --- | --- | --- | --- |
| 1 | Completa | 10/10 | 0/10 | 30 | Perfecta | 3 | No recidiva |  |
| 2 | Nula | 10/10 | 10/10 | 30 | Perfecta | 0 | Extirpación de la lesión por falta de eficacia de NTG |
| 3 | Completa | 4/10 | 0/10 | 15 | Perfecta | 3 | No recidiva |
| 4 | Completa | 5/10 | 0/10 | 30 | Perfecta | 3 | No recidiva |
| 5 | Completa | 9/10 | 0/10 | 30 | Perfecta | 3 | No recidiva |
| 6 | Parcial | 6/10 | 1/10 | 30 | Perfecta | 6 | No recidiva |
| 7 | Parcial | 10/10 | 8/10 | 30 | Perfecta | 6 | Extirpación de la lesión por respuesta escasa |
| 8 | Parcial | 10/10 | 2/10 | 30 | Perfecta | 12 | No recidiva |
| 9 | Parcial | 10/10 | 2/10 | 45 | Perfecta | 17 | No recidiva |
| 10 | Parcial | 10/10 | 2/10 | 45 | Perfecta | 18 | Recidiva tras 18 meses coincidiendo con reinicio de quimioterapia |
| 11 | Parcial | 8/10 | 0/10 | 105 | Perfecta | 3 | Mínima molestia al mes de la finalización que se resolvió en 1 semana con aplicación de NTG |
| 12 | Completa | 6/10 | 0/10 | 45 | Perfecta | 3 | No recidiva |
| 13 | Completa | 10/10 | 0/10 | 10 | Perfecta | 6 | Mínima molestia a los 2 meses de finalización que se resolvió con 10 días de aplicación de NTG |
| 14 | Completa | 7/10 | 0/10 | 67 | Perfecta | 3 | No recidiva |
| 15 | Nula | 8/10 | 8/10 | 30 | Perfecta | 0 | Cirugía por ausencia de respuesta |
| 16 | Completa | 10/10 | 0/10 | 150 | Perfecta | 3 | No recidiva |
| 17 | Completa | 10/10 | 0/10 | 90 | Perfecta | 4 | No recidiva |
| 18 | Parcial | 10/10 | 1/10 | 100 | Perfecta | 4 | No recidiva |
| 19 | Completa | 8/10 | 0/10 | 90 | Perfecta | 6 | A veces usa NTG por molestia mínima con muy buena respuesta |
| 20 | Parcial | 10/10 | 2/10 | 60 | Perfecta | 3 | Mínima molestia a los 3 meses de finalización que se resolvió con 10 días de aplicación de NTG |
| 21 | Parcial | 10/10 | 2/10 | 60 | Perfecta | 12 | No recidiva |
| 22 | Completa | 7/10 | 0/10 | 90 | Perfecta | 7 | Cefalea post-aplicación por exceso de producto. No recidiva |
| 23 | Completa | 7/10 | 0/10 | 60 | Perfecta | 15 | No recidiva |
| 24 | Completa | 10/10 | 0/10 | 45 | Perfecta | 4 | No recidiva |
| 25 | Completa | 10/10 | 0/10 | 45 | Perfecta | 3 | No recidiva |
| 26 | Completa | 10/10 | 4/10 | 37 | Perfecta | 4 | No recidiva |
| 27 | Completa | 4/10 | 0/10 | 37 | Perfecta | 3 | No recidiva |  |
| 28 | Completa | 10/10 | 0/10 | 45 | Perfecta | 3 | No recidiva |  | |
| 29 | Parcial | 8/10 | 2/10 | 90 | Perfecta | 3 | No recidiva |  |
